# Supplementary material for: High-Temperature-Resistant Diverting Acid for Carbonate Formation Fracturing in Sichuan Basin: A Property Evaluation and Field Study
Source: Hindawi journal article supplement (doi:10.1155/2022/1832993), 2022-06-06
Supplement: f1 [file 1832993.f1.pdf]

Relationship between peak viscosity and temperature

| Temperature | Peak Viscosity |
|-------------|----------------|
| 30          | 69             |
| 32.5        | 72             |
| 35          | 70             |
| 37.5        | 76             |
| 40          | 88             |
| 42.5        | 86             |
| 45          | 85             |
| 47.5        | 107            |
| 50          | 118            |
| 52.5        | 152            |
| 55          | 135            |
| 57.5        | 131            |
| 60          | 120            |
| 62.5        | 116            |
| 65          | 105            |
| 67.5        | 122            |
| 70          | 106            |
| 72.5        | 108            |
| 75          | 112            |
| 77.5        | 105            |
| 80          | 102            |
| 82.5        | 110            |
| 85          | 108            |
| 87.5        | 114            |
| 90          | 101            |
| 92.5        | 87             |
| 95          | 90             |
| 97.5        | 71             |
| 100         | 82             |
| 102.5       | 63             |
| 105         | 52             |
| 107.5       | 51             |
| 110         | 53             |
| 112.5       | 48             |
| 115         | 55             |
| 117.5       | 51             |
| 120         | 61             |
| 122.5       | 49             |
| 125         | 50             |
| 127.5       | 57             |
| 130         | 52             |
| 132.5       | 55             |
| 135         | 61             |
| 137.5       | 53             |
| 140         | 42             |
| 142.5       | 45             |
| 145         | 51             |
| 147.5       | 40             |
| 150         | 42             |
| 152.5       | 50             |
| 155         | 48             |
| 157.5       | 43             |
| 160         | 44             |
| 162.5       | 45             |

|       |    |
|-------|----|
| 165   | 51 |
| 167.5 | 38 |
| 170   | 34 |
| 172.5 | 31 |
| 175   | 34 |
