# Supplementary material for: High-Temperature-Resistant Diverting Acid for Carbonate Formation Fracturing in Sichuan Basin: A Property Evaluation and Field Study
Source: Hindawi journal article supplement (doi:10.1155/2022/1832993), 2022-06-06
Supplement: f2 [file 1832993.f2.pdf]

Friction of three kinds of liquids

| Linear velocity | HTRDA | Conventional diverting acid | Water |     |
|-----------------|-------|-----------------------------|-------|-----|
| 8               | 175   |                             | 267   | 555 |
| 9               | 185   |                             | 281   | 587 |
| 10              | 209   |                             | 305   | 649 |
| 11              | 236   |                             | 351   | 750 |
